# Supplementary material for: Mutant Huntingtin Protein Interaction Map Implicates Dysregulation of Multiple Cellular Pathways in Neurodegeneration of Huntington’s Disease
Source: PubMed Central journal article supplement — J Huntingtons Dis. 2022 Aug 30;11(3):243–67. doi: 10.3233/JHD-220538 (PMC9484122; doi:10.3233/jhd-220538), 2022-08-30

# **Supplemental Material**

**Mutant Huntingtin Protein Interaction Map Implicates Dysregulation of Multiple Cellular Pathways in Neurodegeneration of Huntington's Disease**

**Supplementary Figure 1. Gene ontology analysis of proteins interacting exclusively with mutant Htt, and those interacting exclusively with wild-type Htt. Gene ontology (GO) analysis of biological functions of proteins that interact only with mutant Htt is illustrated in (a). GO analysis proteins interacting only with wild-type Htt are shown in (b).**

**(a) Mutant Htt only proteins GO terms**

| GO ID#     | Pathway, biological process             | observed gene count | GO gene count | false discovery rate |
|------------|-----------------------------------------|---------------------|---------------|----------------------|
| GO:0009987 | Cellular process                        | 204                 | 15024         | 7.08E-09             |
| GO:1901699 | Cellular response to nitrogen compound  | 31                  | 645           | 7.78E-08             |
| GO:0006810 | Transport                               | 91                  | 4353          | 2.35E-07             |
| GO:0051234 | Establishment of localization           | 92                  | 4479          | 2.35E-07             |
| GO:0051641 | Cellular localization                   | 71                  | 2967          | 2.35E-07             |
| GO ID#     | Pathway, cell component                 | observed gene count | GO gene count | false discovery rate |
| GO:0030054 | Cell junction                           | 63                  | 2075          | 1.05E-10             |
| GO:0043226 | Organelle                               | 191                 | 13515         | 7.02E-09             |
| GO:0042995 | Cell projection                         | 62                  | 2287          | 7.53E-09             |
| GO:0120025 | Plasma membrane bounded cell projection | 60                  | 2193          | 9.48E-09             |
| GO:0031982 | Vesicle                                 | 85                  | 3879          | 1.09E-08             |
| GO ID#     | Pathway, molecular function             | observed gene count | GO gene count | false discovery rate |
| GO:0003824 | Catalytic activity                      | 94                  | 5486          | 8.50E-04             |
| GO:0005488 | Binding                                 | 172                 | 12516         | 8.50E-04             |
| GO:0005515 | Protein binding                         | 114                 | 7026          | 8.50E-04             |
| GO:0019899 | Enzyme binding                          | 51                  | 2239          | 8.50E-04             |
| GO:0043168 | Anion binding                           | 56                  | 2805          | 3.60E-03             |

**(b) Wild-type Htt only proteins GO terms**

| GO ID#     | Pathway, biological process           | observed gene count | GO gene count | false discovery rate |
|------------|---------------------------------------|---------------------|---------------|----------------------|
| GO:0009987 | Cellular process                      | 288                 | 15024         | 1.43E-07             |
| GO:0016043 | Cellular component organization       | 140                 | 5447          | 2.13E-06             |
| GO:0051649 | Establishment of localization in cell | 78                  | 2375          | 3.62E-06             |
| GO:0051641 | Cellular localization                 | 90                  | 2967          | 4.55E-06             |
| GO:0016192 | Vesicle-mediated transport            | 62                  | 1805          | 3.15E-05             |
| GO ID#     | Pathway, cell component               | observed gene count | GO gene count | false discovery rate |
| GO:0005622 | Intracellular                         | 290                 | 14276         | 3.07E-14             |
| GO:0005737 | Cytoplasm                             | 252                 | 11428         | 2.51E-13             |
| GO:0005829 | Cytosol                               | 152                 | 5193          | 2.51E-13             |
| GO:0043226 | Organelle                             | 279                 | 13515         | 2.51E-13             |
| GO:0043229 | Intracellular organelle               | 261                 | 12528         | 6.80E-11             |
| GO ID#     | Pathway, molecular function           | observed gene count | GO gene count | false discovery rate |
| GO:0005515 | Protein binding                       | 185                 | 7026          | 9.06E-13             |
| GO:0005488 | Binding                               | 260                 | 12516         | 7.40E-10             |
| GO:0045296 | Cadherin binding                      | 27                  | 334           | 2.94E-08             |
| GO:0019899 | Enzyme binding                        | 78                  | 2239          | 4.55E-08             |
| GO:0008092 | Cytoskeletal protein binding          | 45                  | 973           | 2.84E-07             |

**Supplementary Figure 2. N-terminal fragment lengths of wt Htt and mutant Htt used to identify interacting proteins.** The number of published articles reporting use of N-terminal Htt fragments of various lengths is illustrated for studies of wt Htt interactors (a) and mutant Htt interactors (b).

**(a) N-terminal fragment lengths of wild-type Htt**

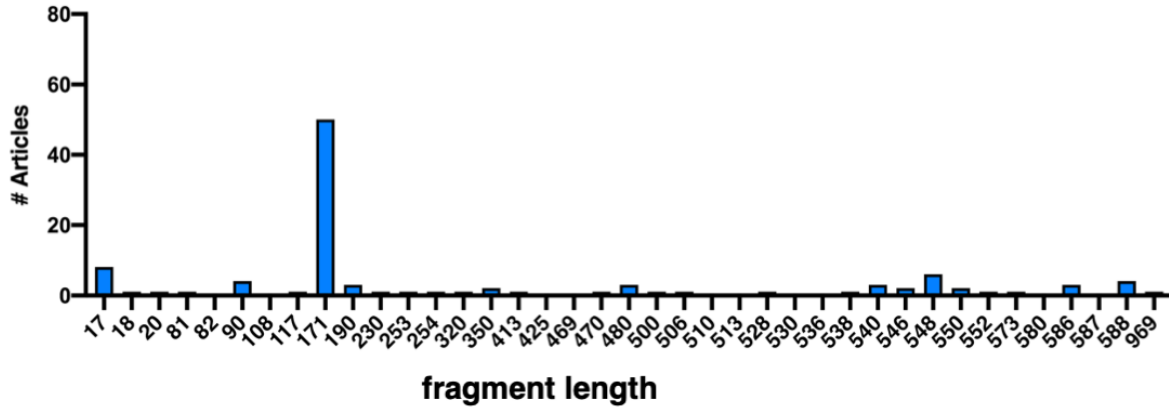

**(b) N-terminal fragment lengths of mutant Htt**

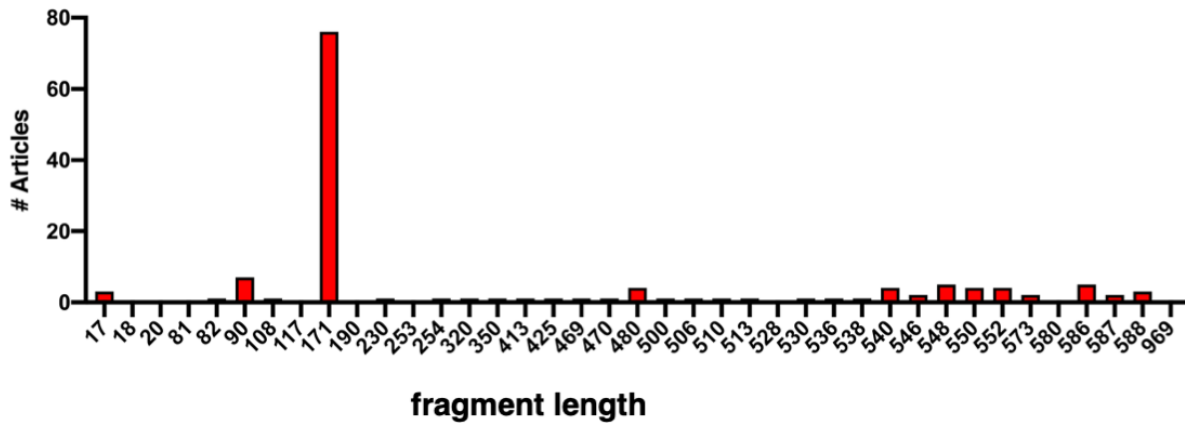

Supplement: jhd-11-jhd220538-s001.pdf [file jhd-11-jhd220538-s001.pdf]
